# Supplementary material for: Sensitive dLight for imaging broad-spectrum dopamine events across brain regions
Source: Research Square preprint supplement (doi:10.21203/rs.3.rs-7313638/v1), 2025-08-20
Supplement: Supplementary file 1 [file 1d0ce914d61438bff7b72464.xlsx]

## Sheet: Supplementary table 1 (2)
Reagent or Resource	Source	Identifier
Bacterial and Virus Strains
pAAV-hSyn-GRAB_ACh3.0	Li Lab	Addgene #121922
DH10β bacteria	Invitrogen	EC0113
AAV9-hSyn-dLight1.3b	UC Davis Viral Core	N/A
AAV9-CAG-dLight3.6	UNC	pAAV-CAG-dLight3.6
AAV9-CAG-dLight3.8	UNC	pAAV-CAG-dLight3.8
AAV2/1-hSyn-FLEX-ChrimsonR-tdTomato	UNC	N/A
AAV1-ihSyn-tTA/TRE-dLight1.3b	Wickens Lab	N/A
AAV1-ihSyn-tTA/TRE-dLight3.6	Wickens Lab	N/A
AAV1-ihSyn-tTA/TRE-dLight3.8	Wickens Lab	N/A
AAV1 CAG DIO dLight3.6	UNC	pAAV-CAG-DIO-dLight3.6
AAV1 CAG DIO dLight3.8	UNC	pAAV-CAG-DIO-dLight3.8
Flex-CAG-dLight1.3b	UC Davis Viral Core	N/A
Chemicals, Peptides, and Recombinant Proteins
Dihydrexidine	Tocris	#0884
SKF-81297	Tocris	#1447
A77636	Tocris	#1701
Apomorphine	Tocris	#2073
SCH-23390	Sigma-Aldrich	D054
SKF-83566	Tocris	#1586
Dopamine	Sigma-Aldrich	H8502
Sulpiride	TCI Chemicals	S0501
Haloperidol	Tocris	#0931
GBR-12909	Tocris	#0421
Chicken anti-GFP	Abcam	ab13970
Donkey Anti-Chicken Alexa 488	Jackson Immuno	703-545-155
Critical Commercial Assays
Platinum SuperFi II Green PCR Master Mix	Invitrogen	12369050
QIAquick PCR Purification Kit	Qiagen	28104
NEBuilder HiFi DNA Assembly Master Mix	New England Biolabs	E2621
Wizard® MagneSil® Plasmid Purification System	Promega	A1630
QIAprep Spin Miniprep Kit buffers	Qiagen	27104
Experimental Models: Cell lines
Flip-In T-Rex 293 cells	Thermo Fisher Scientific	R78007
dLight1.3b stable line	Tian Lab	N/A
dLight3.6 stable line	Tian Lab	N/A
dLight3.6 stable line	Tian Lab	N/A
HEK293T cells	American Type Culture Collection	CRL-3216
Hippocampus from E18 Rat	Brainbits	SDEHP
Experimental Models: Organisms/Strains
C57/BL6J	The Jackson Laboratory	#000664
D1-Cre	The Jackson Laboratory	#037156
D1-Cre	MMRRC	029178-UCD
C57Bl6/J wild type	Envigo USA
C57Bl6/J wild type	Charles River Japan
Mutant DAT-IREScre	The Jackson Laboratory	#006660
Recombinant DNA
pAAV_hSyn- vector	Addgene	111068
pCMV-vector	Addgene	111054
pAAV-CAG-tdTomato	Addgene	59462
AAV pCAG-FLEX-mScarlet-WPRE	Addgene	99280
pAAV-TRE-mTurquoise2-WPRE	Addgene	104110
pAAV-TRE-EYFP-WPRE	Addgene	104111
pAAV-Syn1-tTA	Addgene	104109
Software and Algorithms
Matlab R2022a/R2013b	Mathworks Inc	https://www.mathworks.com
ScanImage 5	Pologruto et al, 2003	http://scanimage.vidriotechnologies.com/
MetaXpress V6.6.3.55	Molecular Devices	https://support.moleculardevices.com/s/article/MetaXpress-6-Download-and-Update-Page
Ocular	Qimaging	https://www.qimaging.com/ocular
Igor Pro	WaveMetrics	https://www.wavemetrics.com
ImageJ V2.1.0/1.53c	Schneider et al, 2012	https://imagej.nih.gov/ij/index.html
Illustrator 2024	Adobe Systems Inc.	https://www.adobe.com/
Video Freeze V3.0.0.0	Med Associates Inc	https://med-associates.com/product/videofreeze-video-fear-conditioning-software/
Doric Neuroscience Studio V5.4.1.12	Doric Lenses	https://neuro.doriclenses.com/products/doric-neuroscience-studio-v5
Prism 9	GraphPad Inc	https://www.graphpad.com
Jupyter Notebook 6.4.6	Jupyter	https://jupyter.org
Arduino IDE 2.3.4	Arduino	https://www.arduino.cc/en/software
Excel 16.72	Microsoft	https://www.microsoft.com/en-us/microsoft-365/excel
Equipment
2-photon Microscope	Scientifica
Small Animal Stereotax	David Kopf Instruments	1900
Zeiss Observer LSN710 confocal	Zeiss
Leica Stellaris 8 Confocal	Leica	Stellaris 8
Doric lenses fiber photometry console and implants	Doric Lenses
Opentrons OT-2	Opentrons
ImageXpress Microconfocal	Molecular Devices
620 nm LED	Prizmatix
PI concentric electrodes	Microprobe	SNEX-100
Headstage	Axon Instruments	CV-7B

## Sheet: Supplementary table 1
Reagent or Resource	Source	Identifier
Bacterial and Virus Strains
NEB 5-alpha competent E. coli (high efficiency)	NEB	C2987I
NEB10-beta competent E. coli (high efficiency)	NEB	C3019I
AAV1-hSyn-κLight1.2a	UC Davis viral core	N/A
AAV1-hSyn-κLight1.2b	UC Davis viral core	N/A
AAV1-hSyn-κLight1.2c	UC Davis viral core	N/A
AAV9-hSyn-κLight1.3	Canadian Neurophotonics	N/A
AAV1-hSyn-κLight0	Canadian Neurophotonics	N/A
AAV9-hSyn-δLight	Canadian Neurophotonics	N/A
AAV1-hSyn-δLight0	Canadian Neurophotonics	N/A
AAV1-CAG-DIO-κLight1.3a	UC Davis viral core	N/A
AAV5-DIO-ChrimsonR-tdTomato	UW NAPE Center viral vector core	N/A
AAV-DJ-CAG-GFP	Addgene	Plasmid #37825
Chemicals, Peptides, and Recombinant Proteins
Dynorphin A17	sigma aldrich	D8147-1MG
Dynorphin A13	Phoenix Pharmaceuticals, Inc.	021-21
Dynorphin A8	Phoenix Pharmaceuticals, Inc.	021-10
Dynorphin B9	Phoenix Pharmaceuticals, Inc.	021-38
Met-enkephalin	Phoenix Pharmaceuticals, Inc.	024-35
Leu-enkephalin	Phoenix Pharmaceuticals, Inc.	024-21
Deltorphin I	Phoenix Pharmaceuticals, Inc.	050-05
DPDPE	Phoenix Pharmaceuticals, Inc.	024-16
DAMGO	Phoenix Pharmaceuticals, Inc.	024-10
β-endorphin	Phoenix Pharmaceuticals, Inc.	022-14
Endomorphin I	Phoenix Pharmaceuticals, Inc.	044-10
Metorphinamide	Phoenix Pharmaceuticals, Inc.	024-54
β-neo-endorphin	Phoenix Pharmaceuticals, Inc.	021-44
BAM18	Phoenix Pharmaceuticals, Inc.	024-06
U50488	Fisher scientific	04-952-5
SNC80	Fisher scientific	50-816-10001
Nalfurafine hydrochloride	AdooQ Bioscience	A12579
Morphine Sulfate	Mallinckrodt	0406-1521-53
Fentanyl citrate salt	Sigma-Aldrich	F3886-25MG
Oxycodone hydrochloride	Sigma-Aldrich	O1378-500MG
(±)-Methadone hydrochloride	Sigma-Aldrich	M0267-1G
Buprenorphine hydrochloride	Sigma-Aldrich	B9275-50MG
Naloxone	Tocris	05-991-00
Norbinaltorphimine	Millipore Sigma	5.08017.0001
ICI174864	Tocris	820
CTAP	Tocris	1560/1
CYD8	Banghart Lab and NIDA Drug Supply Program	N/A
NBQX	HelloBio	Cat #HB0443
CPP	Tocris	Cat #0247
U69593	Millipore Sigma	U103-5MG
SNC162	Tocris	1529
Aticaprant	Research Triangle Institute	14240-115
Critical Commercial Assays
DNA miniprep kit	QIAGEN	27104
PCR purification kitDNA miniprep kit	QIAGEN	27104
Endo-free plasmid maxi kitPCR purification kit	QIAGEN	28104
Lipofectamine2000 transfection reagentEndo-free plasmid maxi kit	QIAGEN	12362
Lipofectamine2000 transfection reagent	ThermoFisher	11668019
Experimental Models: Cell lines
κLight stable line	Tian Lab	N/A
δLight stable line	Tian Lab	N/A
µLight stable line	Tian Lab	N/A
Experimental Models: Organisms/Strains
C57/BL6J	The Jackson Laboratory	N/A
κOR-Cre	Bruchas Lab	N/A
Recombinant DNA
pLVX_EF1a- vector	Tian Lab	N/A
pCMV_delta8.2	Addgene	12263
pAAV_hSyn- vector	Addgene	111068
pCMV-vector	Addgene	111054
pCMV_κLight1.3	Tian Lab	N/A
pCMV_δLight	Tian Lab	N/A
pCMV_µLight	Tian Lab	N/A
pCMV_µLight	Tian Lab	N/A
Software and Algorithms
Matlab R2022a/R2013b	Mathworks Inc	https://www.mathworks.com
ScanImage 5	Pologruto et al, 2003	http://scanimage.vidriotechnologies.com/
MetaXpress V6.6.3.55	Molecular Devices	https://support.moleculardevices.com/s/article/MetaXpress-6-Download-and-Update-Page
Ocular	Qimaging	https://www.qimaging.com/ocular
Igor Pro	WaveMetrics	https://www.wavemetrics.com
ImageJ V2.1.0/1.53c	Schneider et al, 2012	https://imagej.nih.gov/ij/index.html
Illustrator 2024	Adobe Systems Inc.	https://www.adobe.com/
Video Freeze V3.0.0.0	Med Associates Inc	https://med-associates.com/product/videofreeze-video-fear-conditioning-software/
Doric Neuroscience Studio V5.4.1.12	Doric Lenses	https://neuro.doriclenses.com/products/doric-neuroscience-studio-v5
Prism 9	GraphPad Inc	https://www.graphpad.com
Jupyter Notebook 6.4.6	Jupyter	https://jupyter.org
Excel 16.72	Microsoft	https://www.microsoft.com/en-us/microsoft-365/excel
Equipment
2-photon Microscope	Scientifica
Small Animal Stereotax	David Kopf Instruments	1900
Leica Stellaris 8 Confocal	Leica	Stellaris 8
Doric lenses fiber photometry	Doric Lenses
ImageXpress Microconfocal	Molecular Devices
