# Supplementary material for: Sensitive dLight for imaging broad-spectrum dopamine events across brain regions
Source: Research Square preprint supplement (doi:10.21203/rs.3.rs-7313638/v1), 2025-08-20
Supplement: Supplementary file 2 [file 63842122b4d105d0f684cc26.xlsx]

## Sheet: Table3 
			Effective Dopamine Response Under Antagonist
			Affinity for DA (Kd/EC50)					Effective Dynamic Range (DF/F)
	Sensor	Antagonist	0uM	10nM	100nM	1uM	10uM	0uM	10nM	100nM	1uM	10uM
	dLight 3.6	SCH-23390	152 nM	N/A	219.5 nM	588 nM	3.88E+06 nM	805.3 ± 2.0%	NA	782.9 ± 5.0%	701.2 ± 3.3%	559 ± 4.7%
		SKF-83566		425.4 nM	2893 nM	5.57E+04 nM	NA		506.3 ± 4.0%	475.8 ± 7.8%	373.2 ± 19.9%	NA
	dLight 3.8	SCH-23390	584 nM	N/A	1304 nM	5021 nM	1.42E+06 nM	2519.2 ± 31.9%	NA	2347.0 ± 56.2%	1402.0 ± 5.2%	1018.7 ± 5.9%
		SKF-83566		7019 nM	9.31E+04 nM	5.86E+05 nM	NA		2707.9 ± 61.1%	2684.6 ± 49.3%	1866.9 ± 42.8%	NA
	NA: data not available.
	HEK T-Rex cells, µConfocal
