# Supplementary material for: Sensitive dLight for imaging broad-spectrum dopamine events across brain regions
Source: Research Square preprint supplement (doi:10.21203/rs.3.rs-7313638/v1), 2025-08-20
Supplement: Supplementary file 3 [file 7a132a62f5fca7e3ddd1c2e4.xlsx]

## Sheet: Table5
		Effective Dopamine Response Under Norepinephrine
		Affinity for DA (EC50)				Effective Dynamic Range (DF/F)
	Sensor	0uM	1uM	10uM	100uM	0uM	1uM	10uM	100uM
	dLight 1.3b	2005 nM	2198 nM	3196 nM	4197 nM	765.9 ± 3.6%	730.5 ± 10.1%	706.4 ± 13.8%	415.4 ± 3.6%
	dLight 3.6	152 nM	453 nM	792.6 nM	2705 nM	805.3 ± 2.0%	612.8 ± 7.2%	304.1 ± 6.0%	177.4 ± 5.5%
	dLight 3.8	584 nM	910 nM	963 nM	2016 nM	2519.2 ± 31.9%	240.8 ± 16.6%	214.2 ± 312.6%	121.5 ± 16.8%
	HEK T-Rex cells, µConfocal, Norepinephrine as Agonist
