# Supplementary material for: Sensitive dLight for imaging broad-spectrum dopamine events across brain regions
Source: Research Square preprint supplement (doi:10.21203/rs.3.rs-7313638/v1), 2025-08-20
Supplement: Supplementary file 4 [file bd028f7443c1983c74b67bf9.xlsx]

## Sheet: Table6
	dLight properties when expressed in various ways and locations
	Sensor	Method	Expression	Brain Region	Stimulus	Dynamic Range (DF/F)	On Kinetic t1/2 Rise Time	Off Kinetic t1/2 Decay Time
	dLight1.3b	WF	D1 Cells	DLS	p1P	1.2 ± 0.2%		640 ± 149 ms		2.75862
					20P	1.0 ± 0.1%
					MPD+20P	6.4 ± 1.2%
			DAT terminals	DLS	p1P	2.8 ± 0.2%		425 ± 89 ms
					20P	2.5 ± 0.3%
					MPD+20P	10.4 ± 2.0%
	dLight3.6	WF	D1 Cells	DLS	p1P	16.8 ± 3.4%		232 ± 19 ms
					20P	14.4 ± 2.7%
					MPD+20P	18.2 ± 2.7%
			DAT terminals	DLS	p1P	5.7 ± 1.2%		291 ± 30 ms
					20P	5.5 ± 1.3%
					MPD+20P	9.5 ± 2.8%
		2P	D1 Cells	DLS	p1P	137.8 ± 52.7%	≤30 ms	378 ± 25 ms
					20P	147.9 ± 49.5%
				PFC	p1P	4.0 ± 0.6%	≤30 ms	3174 ± 323 ms
					20P	26.2 ± 3.5%
	dLight3.8	WF	D1 Cells	DLS	p1P	23.6 ± 4.0%		178 ± 12 ms	3.59551
					20P	15.9 ± 2.6%
					MPD+20P	37.8 ± 7.2%			2.37736
			DAT terminals	DLS	p1P	4.3 ± 0.8%		312 ± 15 ms
					20P	3.8 ± 0.7%
					MPD+20P	7.8 ± 1.1%
		2P	D1 Cells	DLS	1P	448.5 ± 111.0%	≤30 ms	289 ± 14 ms
					20P	566.1 ± 103.2%
				PFC	1P	10.7 ± 2.1%	≤30 ms	2065 ± 341 ms
					20P	89.5 ± 17.5%
			WT (PhPeB)	DLS	1P	24.1 ± 5.1%	≤30 ms	975 ± 171 ms
					20P	58.3 ± 9.6%
				HPC	10P*	7.75 ± 2.8%	≤30 ms	4955 ± 2306ms
					20P	13.8 ± 5.8%
			WT (B10)	DLS	1P	184.8 ± 32.8%	≤30 ms	735 ± 79 ms
					20P	363.2 ± 47.4%
				PFC	2P*	4.0 ± 0.8%	≤30 ms	3239 ± 349 ms
					20P	36.9 ± 7.7%
				HPC	10P*	8.3 ± 1.9%	≤30 ms	2789 ± 436 ms
					20P	19.3 ± 5.6%
	WF: Widefield, 2P: 2-Photon, WT: Wild Type animal, MPD: methylphenidate
	DLS : Dorsolateral striatum, PFC: Prefrontal Cortex, HPC : Hippocampus
	p1P: pseudo-one pulse, #P: Number of pulses, *Lowest clear response detected
