# Supplementary material for: Sensitive dLight for imaging broad-spectrum dopamine events across brain regions
Source: Research Square preprint supplement (doi:10.21203/rs.3.rs-7313638/v1), 2025-08-20
Supplement: Supplementary file 5 [file c57beecb27f9d3efd7d53888.xlsx]

## Sheet: Table2
	Sensor	Stimulus	Affinity (Kd/EC50)	Dynamic Range (DF/F)	NE/DA Ratio	s-slope (uM-1)
	dLight 1.3b	DA	294 nM	783.8 ± 213%		2.65306
	dLight 3.6	DA	48 nM	1314.2 ± 105.8%	63	27.375
		NE	3024 nM	635.9 ± 45.4%
	dLight 3.8	DA	156 nM	4384.8 ± 334%	64	28.0769
		NE	10122 nM	1280.9 ± 33.5%
	Hippocampal neuronal culture, Confocal imaging, promoter hSyn-tTA/TRE
