# Supplementary material for: Sensitive dLight for imaging broad-spectrum dopamine events across brain regions
Source: Research Square preprint supplement (doi:10.21203/rs.3.rs-7313638/v1), 2025-08-20
Supplement: Supplementary file 6 [file cd2c64d7cc9abb888f1c278f.xlsx]

## Sheet: Table4 
	Sensor	Stimulus	Affinity (Kd/EC50)	Dynamic Range (DF/F)	NE/DA Ratio
	dLight 1.3b	DA	2005 nM	765.9 ± 3.6%	40
		NE	79354 nM	576 ± 2.0%
		SE	ND	4.5% ± 1.6%
	dLight 3.6	DA	152 nM	805.3 ± 2.0%	46
		NE	7015 nM	617.0 ± 28.2%
		SE	ND	37.2 ± 11.9%
	dLight 3.8	DA	584nM	2519.2 ± 31.9%	42
		NE	24750 nM	1358 ± 10.5%
		SE	ND	45.2 ± 0.4%
	ND: not detected
	HEK T-Rex cells, µConfocal
