# Supplementary figures and images for: Sensitive dLight for imaging broad-spectrum dopamine events across brain regions
Source: Research Square preprint supplement (doi:10.21203/rs.3.rs-7313638/v1), 2025-08-20

## Nucleus accumbens

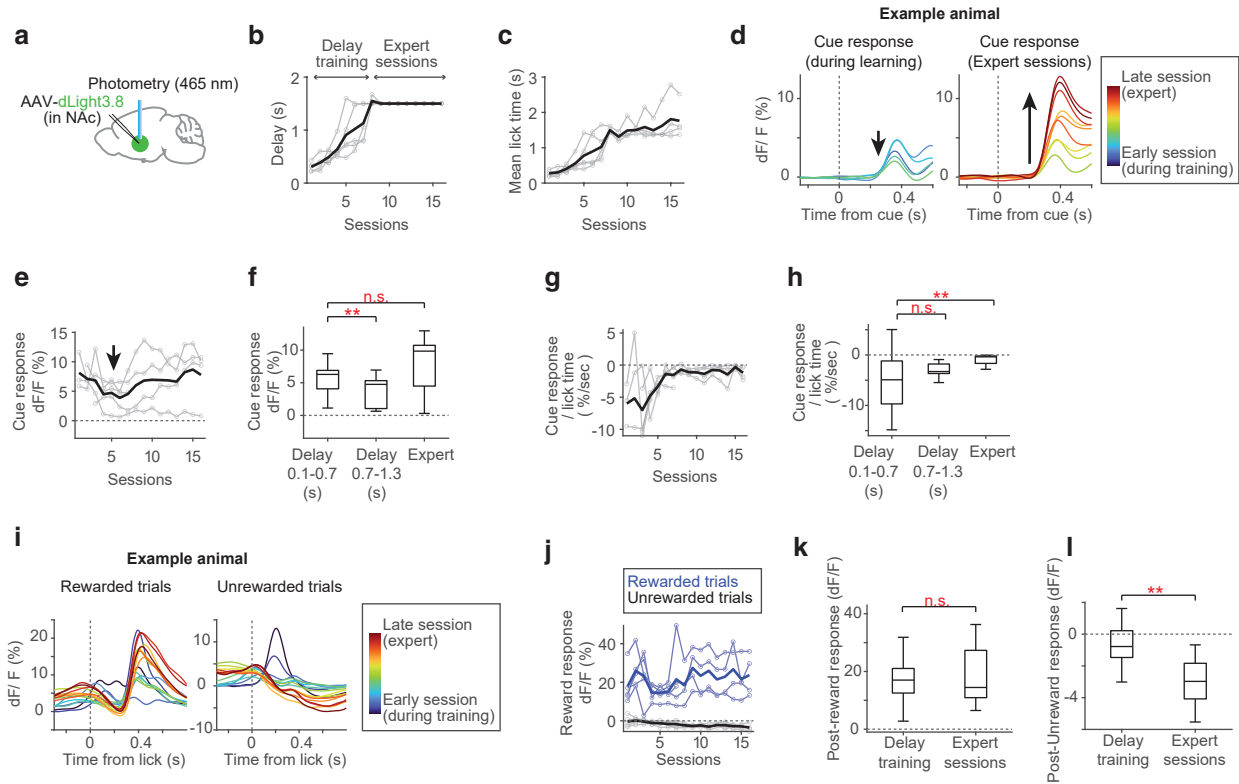

## Dorsolateral striatum (DLS)

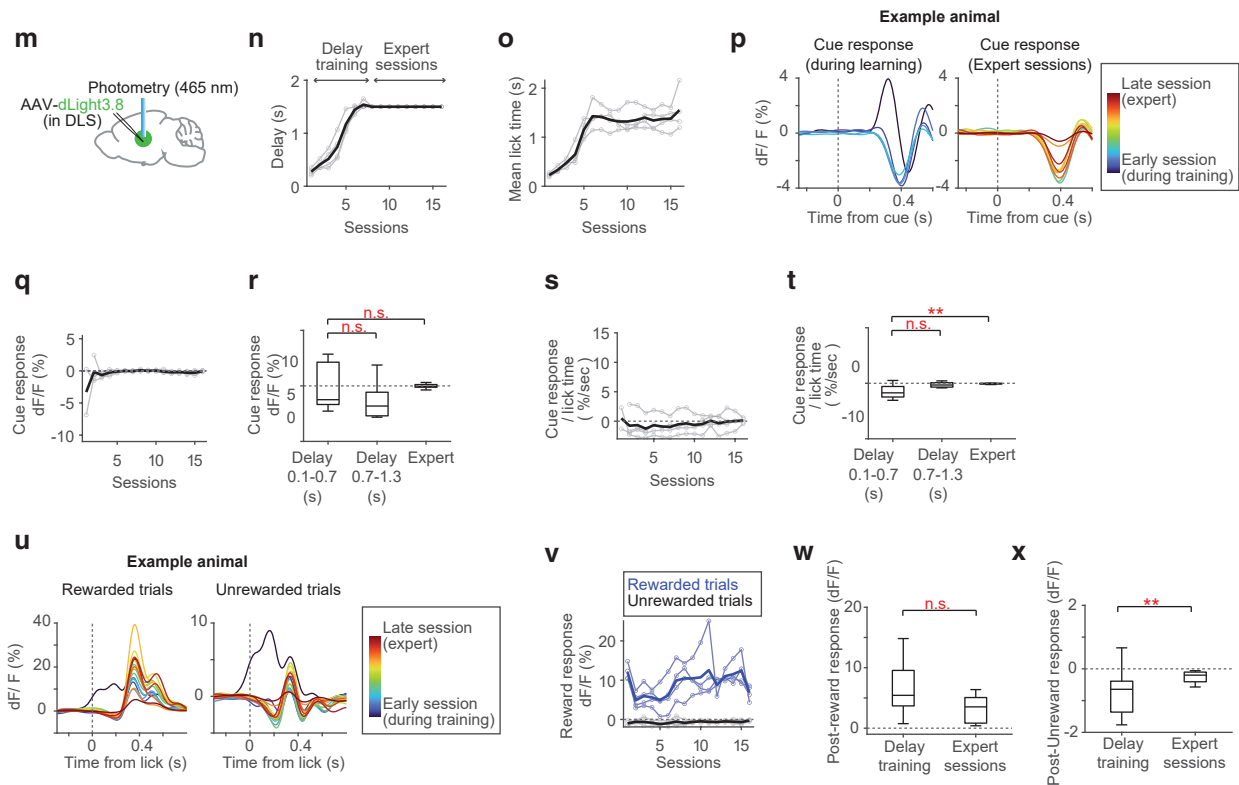

Supplement: Supplementary file 1 [file 1c90b67a2ee5df84c78d9bf0.pdf]
